# Supplementary material for: Subject classification and cross-time prediction based on functional connectivity and white matter microstructure features in a rat model of Alzheimer’s using machine learning
Source: Springer Nature journal article supplement (doi:10.1186/s13195-023-01328-0), 2023-11-07
Supplement: MOESM1 [file 26275038]

## Subject classification and cross-time prediction based on functional connectivity and white matter microstructure features in a rat model of Alzheimer's using machine learning

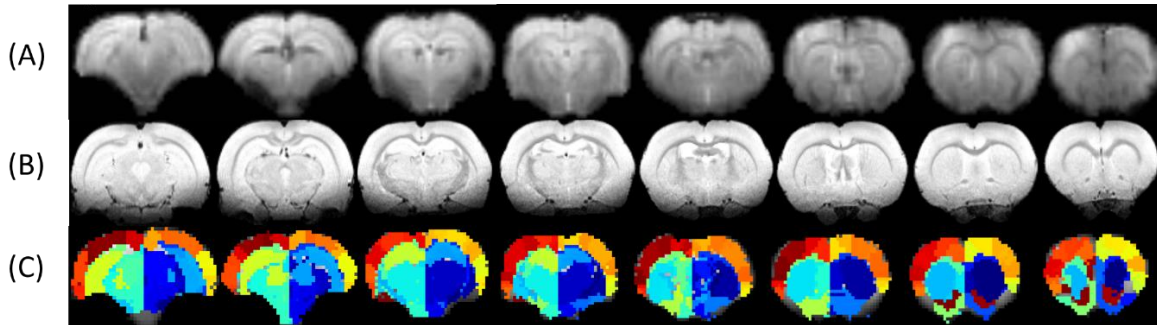

**Figure S1** Example of rs-fMRI images of 8 coronal slices (A), matching anatomical MR images (B) and atlas-based anatomical labels registered to the fMRI images (C). (Image taken from <https://www.frontiersin.org/articles/10.3389/fnins.2021.602170/full>)

**Table S1** A list of 28 atlas-defined regions of interest (ROIs, 14 per hemisphere) for the fMRI data. The ROIs were regrouped based on the original labels of the Waxholm Space (WHS) Atlas of the rat brain (<https://www.nitrc.org/projects/whs-sd-atlas>).

| ROIs | Names                          | ROI Labels (Right) | ROI Labels (Left) | Original WHS Labels (Right) | Original WHS Labels (Left)        |
|------|--------------------------------|--------------------|-------------------|-----------------------------|-----------------------------------|
| ACC  | cingulate cortex               | 2                  | 1                 | 164,165                     | 212,213                           |
| RSC  | retrosplenial cortex           | 4                  | 3                 | 183,184,185                 | 231,232,233                       |
| PPC  | posterior parietal cortex      | 6                  | 5                 | 174,178,180,181,182         | 222,226,228,229,230               |
| MTL  | temporal association cortex    | 8                  | 7                 | 179,197,170,167,168,177,204 | 227, 245, 218, 215, 216, 225, 252 |
| Hip  | hippocampus                    | 10                 | 9                 | 73,74,75,76                 | 151,152,153,154                   |
| Sub  | subiculum                      | 12                 | 11                | 70                          | 148                               |
| AU   | auditory cortex                | 14                 | 13                | 161,162,163                 | 209,210,211                       |
| V    | visual cortex                  | 16                 | 15                | 198:203                     | 246:251                           |
| S1   | primary somatosensory cortex   | 18                 | 17                | 186:195                     | 234:243                           |
| S2   | secondary somatosensory cortex | 20                 | 19                | 196                         | 244                               |
| M    | motor cortex                   | 22                 | 21                | 175,176                     | 223,224                           |
| CPu  | striatum                       | 24                 | 23                | 8                           | 86                                |
| Tha  | thalamus                       | 26                 | 25                | 17                          | 95                                |
| HTh  | hypothalamus                   | 28                 | 27                | 26                          | 104                               |
